# Is Isoflurane-induced Preconditioning Dose Related?

Franz Kehl, M.D., D.E.A.A.,\* John G. Krolikowski, B.A.,† Boris Mraovic, M.D.,\* Paul S. Pagel, M.D., Ph.D.,‡ David C. Warltier, M.D., Ph.D.,§ Judy R. Kersten, M.D.¶

**Background:** Volatile anesthetics precondition against myocardial infarction, but it is unknown whether this beneficial action is threshold- or dose-dependent. The authors tested the hypothesis that isoflurane decreases myocardial infarct size in a dose-dependent fashion *in vivo*.

**Methods:** Barbiturate-anesthetized dogs ( $n = 40$ ) were instrumented for measurement of systemic hemodynamics including aortic and left ventricular pressures and rate of increase of left ventricular pressure. Dogs were subjected to a 60-min left anterior descending coronary artery occlusion followed by 3 h of reperfusion and were randomly assigned to receive either 0.0, 0.25, 0.5, 1.0, or 1.25 minimum alveolar concentration (MAC) isoflurane in separate groups. Isoflurane was administered for 30 min and discontinued 30 min before left anterior descending coronary artery occlusion.

**Results:** Infarct size (triphenyltetrazolium staining) was  $29 \pm 2\%$  of the area at risk in control experiments (0.0 MAC). Isoflurane produced significant ( $P < 0.05$ ) reductions of infarct size ( $17 \pm 3$ ,  $13 \pm 1$ ,  $14 \pm 2$ , and  $11 \pm 1\%$  of the area at risk during 0.25, 0.5, 1.0, and 1.25 MAC, respectively). Infarct size was inversely related to coronary collateral blood flow (radioactive microspheres) in control experiments and during low (0.25 or 0.5 MAC) but not higher concentrations of isoflurane. Isoflurane shifted the linear regression relation between infarct size and collateral perfusion downward (indicating cardioprotection) in a dose-dependent fashion.

**Conclusions:** Concentrations of isoflurane as low as 0.25 MAC are sufficient to precondition myocardium against infarction. High concentrations of isoflurane may have greater efficacy to protect myocardium during conditions of low coronary collateral blood flow.

VOLATILE anesthetics protect myocardium against stunning and infarction. These beneficial actions appear to occur through a signal transduction pathway that is remarkably similar to that observed during ischemic preconditioning (IPC). Activation of adenosine receptors,<sup>1–3</sup> protein kinase C,<sup>2,4</sup> inhibitory guanine regulatory proteins,<sup>5</sup> and mitochondrial and sarcolemmal adenosine triphosphate-regulated potassium ( $K_{ATP}$ ) channels<sup>6–9</sup> have been implicated in anesthetic-induced preconditioning. Isoflurane-induced preconditioning and IPC de-

crease myocardial infarct size by 50–60%.<sup>2,7,9–11</sup> Controversy exists as to whether IPC or  $K_{ATP}$  channel agonists reduce infarct size through threshold- or dose-dependent mechanisms. Whether a threshold concentration of isoflurane less than 1 minimum alveolar concentration (MAC) protects myocardium from infarction is also unknown. We tested the hypothesis that isoflurane decreases myocardial infarct size in a dose-dependent manner using a range of concentrations between 0.25 and 1.25 MAC. We also evaluated the relation between myocardial infarct size and coronary collateral blood flow in the presence and absence of isoflurane to determine if this relation is altered by the anesthetic agent.

## Methods

All experimental procedures and protocols used in this investigation were reviewed and approved by the Animal Care and Use Committee of the Medical College of Wisconsin. All conformed to the *Guiding Principles in the Care and Use of Animals* of the American Physiologic Society and were in accordance with the *Guide for the Care and Use of Laboratory Animals*.<sup>12</sup>

### General Preparation

Surgical implantation of instruments has been previously described in detail.<sup>6</sup> Briefly, dogs were anesthetized with sodium barbital (200 mg/kg) and sodium pentobarbital (15 mg/kg) and ventilated using positive pressure with an air and oxygen mixture after tracheal intubation. End-tidal concentrations of isoflurane were measured at the tip of the endotracheal tube by an infrared anesthetic analyzer. A 7-French, dual micromanometer-tipped catheter was inserted into the aorta and left ventricle (LV) for measurement of aortic and LV pressures and the maximum rate of increase of LV pressure ( $+dP/dt_{max}$ ). Heparin-filled catheters were inserted into the left atrial appendage and the right femoral artery for administration of radioactive microspheres and withdrawal of reference blood flow samples, respectively. A 1-cm segment of the left anterior descending coronary artery (LAD) immediately distal to the first diagonal branch was isolated, and a silk ligature was placed around the vessel for production of coronary artery occlusion and reperfusion. Hemodynamics were continuously monitored on a polygraph and digitized using a computer interfaced with an analog-to-digital converter.

### Experimental Protocol

Baseline hemodynamics were recorded 90 min after instrumentation was completed. All dogs were subjected

\* Research Fellow, † Research Technologist, ‡ Professor, Director of Cardiac Anesthesia, Department of Anesthesiology, § Professor, Departments of Anesthesiology, Pharmacology and Toxicology, and Medicine, and Vice Chairman for Research, Department of Anesthesiology, || Professor, Departments of Anesthesiology, Pharmacology and Toxicology.

Received from the Departments of Anesthesiology, Pharmacology and Toxicology, and Medicine, the Medical College of Wisconsin and the Zablocki VA Medical Center, Milwaukee, Wisconsin. Submitted for publication July 7, 2001. Accepted for publication October 18, 2001. Supported in part by grants No. HL 03690 and HL 63705 (to Dr. Kersten), HL 54280 (to Dr. Warltier), AA 12331 (to Dr. Pagel), and Anesthesia Research Training Grant No. GM 08377 (to Dr. Warltier) from the United States Public Health Service, National Institutes of Health, Bethesda, Maryland.

Address reprint requests to Dr. Kersten: Department of Anesthesiology, Medical College of Wisconsin, 8701 Watertown Plank Road, Milwaukee, Wisconsin 53226. Address electronic mail to: jkersten@mcw.edu. Individual article reprints may be purchased through the Journal Web site, [www.anesthesiology.org](http://www.anesthesiology.org).

to a 60-min LAD occlusion followed by 3 h of reperfusion. Dogs were randomly assigned to receive 0.0, 0.25, 0.5, 1.0, and 1.25 MAC isoflurane in separate experimental groups. The canine MAC of isoflurane used in the current investigation was 1.28%.<sup>13</sup> Isoflurane was administered for 30 min and discontinued 30 min before LAD occlusion. Regional myocardial blood flow was measured 30 min before and during LAD occlusion, and 60 min after the onset of reperfusion. Dogs that developed intractable ventricular fibrillation and those with subendocardial collateral blood flow greater than  $0.15 \text{ ml} \cdot \text{min}^{-1} \cdot \text{g}^{-1}$  were excluded from data analysis.<sup>14</sup>

#### *Measurement of Myocardial Infarct Size*

At the end of each experiment, myocardial infarct size was measured as previously described.<sup>15</sup> The LV area at risk (AAR) for infarction was separated from the normal area (stained with Patent blue dye), and the two regions were incubated at 37°C for 20–30 min in 1% 2,3,5-triphenyltetrazolium chloride in 0.1 M phosphate buffer adjusted to pH 7.4. After overnight storage in 10% formaldehyde, infarcted and noninfarcted myocardium within the AAR were carefully separated and weighed. Infarct size was expressed as a percentage of the AAR.

#### *Determination of Regional Myocardial Blood Flow*

Carbonized plastic microspheres ( $15 \pm 2 \mu\text{m}$  [SD] in diameter) labeled with  $^{141}\text{Ce}$ ,  $^{103}\text{Ru}$ , or  $^{95}\text{Nb}$  were used to measure regional myocardial perfusion as previously described.<sup>6</sup> Transmural tissue samples were selected from the ischemic region (distal to the LAD occlusion) and were subdivided into subepicardial, midmyocardial, and subendocardial layers of approximately equal thickness. Samples were weighed, placed in scintillation vials, and the activity of each isotope was determined. Similarly, the activity of each isotope in the reference blood flow sample was assessed. Tissue blood flow (milliliters per minute per gram) was calculated as  $Q_r \cdot C_m \cdot C_r^{-1}$ , where  $Q_r$  indicates the rate of withdrawal of the reference blood flow sample (milliliters per minute),  $C_m$  indicates the activity (counts per minute per gram) of the myocardial tissue sample, and  $C_r$  indicates the activity (counts per minute) of the reference blood flow sample. Transmural blood flow was considered as the average of subepicardial, midmyocardial, and subendocardial blood flows. Coronary collateral blood flow was measured in the central ischemic zone (LAD perfusion area) after 30 min of coronary artery occlusion.

#### *Statistical Analysis*

Statistical analysis of data within and between groups was performed with analysis of variance for repeated measures followed by Student-Newman-Keuls test. The relation between myocardial infarct size and coronary collateral blood flow was evaluated with linear regres-

sion analysis. Analysis of covariance was used to compare regression relations among groups. Changes within and between groups were considered statistically significant when the  $P$  value was  $< 0.05$ . All data are expressed as mean  $\pm$  standard error of the mean.

## **Results**

Forty dogs were instrumented to obtain 36 successful experiments. Four dogs were excluded from the overall analysis because subendocardial collateral blood flow was greater than  $0.15 \text{ ml} \cdot \text{min}^{-1} \cdot \text{g}^{-1}$  (1, 0.0 MAC; 2, 0.25 MAC; and 1, 0.5 MAC). These four dogs were included in the specific analysis of the relation between coronary collateral blood flow and myocardial infarct size.

#### *Systemic Hemodynamics*

There were no differences in hemodynamics between experimental groups during baseline conditions (table 1). Isoflurane caused dose-dependent decreases in heart rate, mean arterial and LV systolic pressures, and LV  $+dP/dt_{\text{max}}$ . Heart rate and mean arterial pressure returned to baseline values within 30 min after discontinuation of isoflurane in dogs receiving concentrations less than 1.0 MAC. In contrast, mean arterial and LV systolic pressures remained depressed during LAD occlusion and reperfusion in dogs receiving 1.25 MAC isoflurane as compared with control experiments. There were no differences in hemodynamics between groups after 3-h reperfusion.

#### *Myocardial Infarct Size and Coronary Collateral Blood Flow*

The LV AAR was similar between groups (control,  $37 \pm 2$ ; 0.25 MAC isoflurane,  $40 \pm 2$ ; 0.5 MAC isoflurane,  $40 \pm 3$ ; 1.0 MAC isoflurane,  $38 \pm 1$ ; 1.25 MAC isoflurane,  $44 \pm 2\%$  of LV mass). Myocardial infarct size expressed as a percentage of the AAR was  $29 \pm 2\%$  ( $n = 8$ ) in dogs that did not receive isoflurane (0.0 MAC). Isoflurane (0.25, 0.5, 1.0, and 1.25 MAC) reduced infarct size to  $17 \pm 3$  ( $n = 8$ ),  $13 \pm 1$  ( $n = 7$ ),  $14 \pm 2$  ( $n = 7$ ), and  $11 \pm 1\%$  ( $n = 6$ ) of the AAR, respectively (fig. 1). An inverse relation between myocardial infarct size and coronary collateral blood flow was observed in dogs receiving 0.0, 0.25, and 0.5 MAC isoflurane (fig. 2). Isoflurane also caused a dose-related downward shift in the regression relation. Infarct size was unrelated to coronary collateral blood flow during 1.0 and 1.25 MAC isoflurane (fig. 3). There were no differences in transmural myocardial perfusion during control conditions and after 1-h reperfusion among groups (table 2). Coronary collateral blood flow was also similar among all groups.

Table 1. Systemic Hemodynamics

|                                | Baseline    | Intervention | 30 min CAO   | Reperfusion (h) |              |              |
|--------------------------------|-------------|--------------|--------------|-----------------|--------------|--------------|
|                                |             |              |              | 1               | 2            | 3            |
| HR (beats/min)                 |             |              |              |                 |              |              |
| CON                            | 129 ± 6     | 129 ± 7†     | 125 ± 6      | 127 ± 10        | 125 ± 9      | 126 ± 9      |
| ISO <sub>0.25</sub> MAC        | 127 ± 8     | 124 ± 8†     | 127 ± 6      | 117 ± 5         | 120 ± 5      | 124 ± 4      |
| ISO <sub>0.5</sub> MAC         | 124 ± 3     | 110 ± 5      | 114 ± 4      | 107 ± 6         | 111 ± 7      | 111 ± 8      |
| ISO <sub>1.0</sub> MAC         | 137 ± 3     | 111 ± 1*     | 126 ± 2      | 123 ± 4         | 126 ± 6      | 132 ± 8      |
| ISO <sub>1.25</sub> MAC        | 129 ± 4     | 95 ± 6*‡     | 112 ± 3*     | 105 ± 5*        | 103 ± 5*     | 106 ± 5*     |
| MAP (mmHg)                     |             |              |              |                 |              |              |
| CON                            | 106 ± 8     | 108 ± 8      | 100 ± 9      | 107 ± 9         | 110 ± 8      | 108 ± 9      |
| ISO <sub>0.25</sub> MAC        | 90 ± 4      | 81 ± 5†‡     | 87 ± 3       | 94 ± 2          | 94 ± 5       | 97 ± 4       |
| ISO <sub>0.5</sub> MAC         | 102 ± 4     | 79 ± 4*†‡    | 92 ± 4       | 100 ± 3         | 102 ± 4      | 105 ± 4      |
| ISO <sub>1.0</sub> MAC         | 106 ± 3     | 65 ± 3*‡     | 92 ± 3*      | 94 ± 4*         | 99 ± 3       | 100 ± 5      |
| ISO <sub>1.25</sub> MAC        | 104 ± 7     | 56 ± 5*‡     | 80 ± 5*      | 83 ± 3*‡        | 85 ± 5*‡     | 90 ± 5*      |
| LVSP (mmHg)                    |             |              |              |                 |              |              |
| CON                            | 116 ± 7     | 115 ± 7      | 112 ± 10     | 117 ± 11        | 118 ± 8      | 115 ± 10     |
| ISO <sub>0.25</sub> MAC        | 104 ± 3     | 92 ± 6†‡     | 95 ± 3       | 101 ± 3         | 99 ± 5       | 102 ± 3      |
| ISO <sub>0.5</sub> MAC         | 113 ± 5     | 84 ± 5*†‡    | 97 ± 4*      | 104 ± 4         | 107 ± 4      | 110 ± 4      |
| ISO <sub>1.0</sub> MAC         | 115 ± 4     | 72 ± 3*‡     | 97 ± 2*      | 98 ± 4*         | 103 ± 4*     | 102 ± 4*     |
| ISO <sub>1.25</sub> MAC        | 115 ± 6     | 60 ± 4*‡     | 84 ± 6*‡     | 85 ± 3*‡        | 88 ± 6*‡     | 95 ± 5*      |
| LVEDP (mmHg)                   |             |              |              |                 |              |              |
| CON                            | 6 ± 1       | 4 ± 1        | 15 ± 3*      | 15 ± 3*         | 15 ± 3*      | 14 ± 3*      |
| ISO <sub>0.25</sub> MAC        | 6 ± 1       | 5 ± 1        | 9 ± 2†       | 11 ± 2*         | 9 ± 2        | 9 ± 2        |
| ISO <sub>0.5</sub> MAC         | 8 ± 2       | 9 ± 1†       | 14 ± 2       | 19 ± 3*         | 15 ± 2*      | 17 ± 2*      |
| ISO <sub>1.0</sub> MAC         | 7 ± 1       | 9 ± 1†       | 15 ± 2*      | 15 ± 2*         | 15 ± 3*      | 14 ± 2*      |
| ISO <sub>1.25</sub> MAC        | 6 ± 2       | 8 ± 2†       | 19 ± 3*‡     | 19 ± 2*         | 18 ± 3*      | 13 ± 2*      |
| +dP/dt <sub>max</sub> (mmHg/s) |             |              |              |                 |              |              |
| CON                            | 1,920 ± 160 | 1,870 ± 150  | 1,610 ± 180  | 1,630 ± 210     | 1,580 ± 150  | 1,490 ± 200* |
| ISO <sub>0.25</sub> MAC        | 1,870 ± 90  | 1,720 ± 190† | 1,630 ± 110  | 1,510 ± 120     | 1,420 ± 130  | 1,490 ± 110  |
| ISO <sub>0.5</sub> MAC         | 1,750 ± 120 | 1,180 ± 60*‡ | 1,540 ± 130  | 1,400 ± 50*     | 1,430 ± 40*  | 1,370 ± 70*  |
| ISO <sub>1.0</sub> MAC         | 2,020 ± 140 | 1,030 ± 50*‡ | 1,590 ± 100* | 1,470 ± 100*    | 1,480 ± 80*  | 1,470 ± 100* |
| ISO <sub>1.25</sub> MAC        | 1,760 ± 110 | 830 ± 50*‡   | 1,300 ± 120* | 1,380 ± 70*     | 1,290 ± 140* | 1,230 ± 70*  |

Data are mean ± standard error of the mean.

\* Significantly ( $P < 0.05$ ) different from baseline. † Significantly ( $P < 0.05$ ) different from the respective value during 1.25 minimum alveolar concentration (MAC) isoflurane. ‡ Significantly ( $P < 0.05$ ) different from the respective value during control (0.0 MAC) experiments.

CAO = coronary artery occlusion; HR = heart rate; MAP = mean aortic pressure; LVSP = left ventricular systolic pressure; LVEDP = left ventricular end-diastolic pressure; +dP/dt<sub>max</sub> = maximal rate of increase of left ventricular pressure; CON = control; ISO = isoflurane.

## Discussion

A minimum duration of ischemia is required to activate endogenous protective signal transduction during IPC. For example, an ischemic duration between 2 and 3 min alone<sup>16-19</sup> is insufficient to produce IPC. This threshold

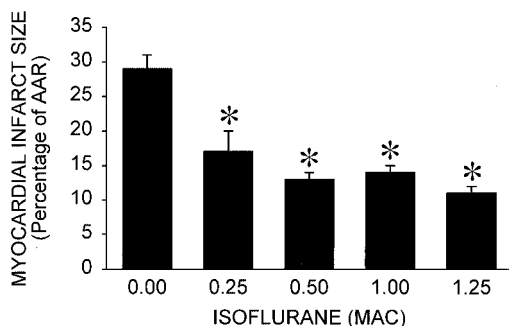

Fig. 1. Myocardial infarct size expressed as a percentage of the area at risk (AAR) in dogs receiving isoflurane (0.25, 0.5, 1.0, or 1.25 minimum alveolar concentration [MAC]). \*Significantly ( $P < 0.05$ ) different from control experiments (0.0 MAC).

may be pharmacologically altered. Administration of K<sub>ATP</sub> channel agonists<sup>18,20</sup> or an allosteric enhancer of the A<sub>1</sub> adenosine receptor<sup>17</sup> in doses that are insufficient to elicit protection alone decrease the time threshold of IPC. Volatile anesthetics also activate K<sub>ATP</sub> channels and A<sub>1</sub> receptors, but whether a minimal threshold dose of these agents is required to produce myocardial protection is unknown. The current study was designed to examine if isoflurane-induced preconditioning is dose-related.

Our results indicate that concentrations of isoflurane as low as 0.25 MAC are sufficient to precondition myocardium against infarction. These data contrast with our previous findings demonstrating that 1 MAC sevoflurane does not protect against infarction when this anesthetic is washed out 30 min before coronary artery occlusion.<sup>16</sup> Sevoflurane appears to retain a significantly shorter "memory" than that characteristic of isoflurane<sup>7</sup> and IPC,<sup>19</sup> which allows myocardium to remain resistant to infarction after the initial preconditioning stimulus is removed. Nevertheless, previous exposure to sevoflu-



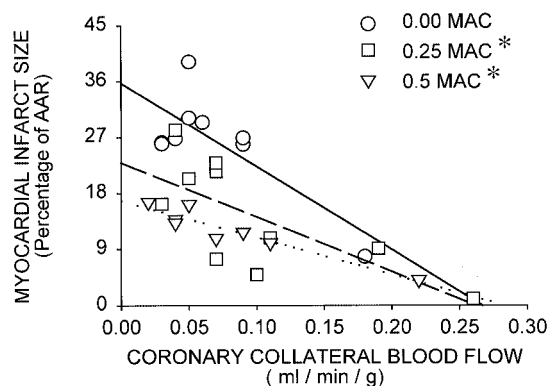

Fig. 2. Relation between myocardial infarct size and coronary collateral blood flow in dogs receiving isoflurane (0.0, 0.25, or 0.5 minimum alveolar concentration [MAC]). An inverse relation was observed in each group (0.0 MAC:  $y = -1.33.8x + 35.7$ ,  $r = -0.78$ ,  $P = 0.01$ ; 0.25 MAC:  $y = -87.6x + 22.9$ ,  $r = -0.72$ ,  $P = 0.02$ ; 0.5 MAC:  $y = -59.1x + 16.8$ ,  $r = -0.94$ ,  $P = 0.001$ ). The infarct size-collateral flow relation was shifted downward by 0.25 or 0.5 MAC isoflurane. \*Significantly ( $P < 0.05$ ) different from control experiments (0.0 MAC).

rane reduced the time threshold for IPC to occur.<sup>16</sup> Taken together, these results suggest that the threshold concentration required to precondition myocardium may be specific for a given volatile anesthetic agent and, furthermore, may differ depending on the length of exposure or the duration of the washout or memory period.

Whether further myocardial protection may be conferred by additional ischemic episodes or higher doses of pharmacologic agonists after an initial threshold stimulus is exceeded is highly controversial. A single 5-min coronary artery occlusion reduced infarct size to a sim-

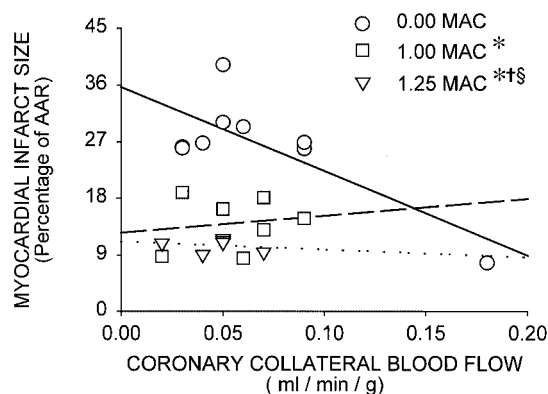

Fig. 3. Relation between myocardial infarct size and coronary collateral blood flow in dogs receiving isoflurane (0.0, 1.0, or 1.25 minimum alveolar concentration [MAC]). Myocardial infarct size is decreased by 1.0 or 1.25 MAC isoflurane independent of coronary collateral blood flow (1.0 MAC:  $y = 26.5x + 12.6$ ,  $r = 0.16$ ,  $P = \text{nonsignificant}$ ; 1.25 MAC:  $y = -12.5x + 11.2$ ,  $r = -0.21$ ,  $P = \text{nonsignificant}$ ). The regression relation is shifted downward by isoflurane in a dose-related fashion. \*Significantly ( $P < 0.05$ ) different from control experiments (0.0 MAC). †Significantly ( $P < 0.05$ ) different from experiments during 0.25 MAC. §Significantly ( $P < 0.05$ ) different from experiments during 0.5 MAC.

ilar extent as multiple (2–12) episodes of preconditioning ischemia in dogs<sup>21,22</sup> and rabbits.<sup>19</sup> In contrast, results of another study indicated that a single episode of IPC decreased myocardial infarct size by only 40%, but three sequential episodes markedly reduced infarct size by nearly 100%.<sup>23</sup> Preconditioning with adenosine is dose-dependent,<sup>24</sup> but the  $K_{ATP}$  channel agonist bimakalim produced equivalent reductions in infarct size in one study when administered at concentrations that varied by 30-fold.<sup>25</sup> More recently, diazoxide was shown to produce dose-dependent protection against infarction in dogs that may be attributable to activation of both mitochondrial and sarcolemmal  $K_{ATP}$  channels.<sup>26</sup>

The current results suggest that isoflurane-induced reduction in myocardial infarct size may be dose-dependent, but this effect is only evident in the presence of low coronary collateral blood flow. Infarct size was approximately 10% of the AAR in dogs receiving 1.25 MAC isoflurane, with coronary collateral blood flows that ranged between 0.02 and 0.07  $\text{ml} \cdot \text{min}^{-1} \cdot \text{g}^{-1}$ . In contrast, lower concentrations (0.25 or 0.5 MAC) of isoflurane did not appear to reduce infarct size to this degree (approximately 18%) in experiments in which coronary collateral blood flow was less than 0.05  $\text{ml} \cdot \text{min}^{-1} \cdot \text{g}^{-1}$ . The importance of collateral blood flow as a determinant of infarct size during low but not high concentrations of isoflurane is similar to findings observed during IPC. The extent of infarction has been demonstrated to be inversely related to collateral blood flow in pigs subjected to a 3-min episode of preconditioning ischemia, and the regression relation is shifted downward when compared with control experiments.<sup>27</sup> A 10-min preconditioning episode shifted the regression relation further downward to such a degree that infarct size was no longer dependent on collateral blood flow. Thus, the current and previous results suggest that evaluation of the relation between infarct size and collateral blood flow may be a sensitive method of determining whether anesthetic-induced preconditioning is dose-related.

Isoflurane produced dose-related decreases in heart rate, arterial pressure, and  $\text{LV dp/dt}_{\text{max}}$ . Isoflurane was discontinued 30 min before the LAD occlusion, but the hemodynamic effects of the 1.25 MAC concentration persisted into the reperfusion period. Alterations in myocardial metabolism during and after the administration of isoflurane may be partially responsible for the protection against infarction observed in dogs receiving higher concentrations of this agent. We and other investigators have previously demonstrated that the protective effects of volatile anesthetics were abolished by  $K_{ATP}$  channel antagonists. This action was observed despite the presence of similar hemodynamic conditions with or without  $K_{ATP}$  channel blockade.<sup>7,8,16</sup> Thus, it appears unlikely that hemodynamic effects of higher concentra-

Table 2. Transmural Perfusion in the Ischemic (LAD) Region ( $\text{ml} \cdot \text{min}^{-1} \cdot \text{g}^{-1}$ )

|                         | Baseline        | 30 min CAO        | 1 h Reperfusion   |
|-------------------------|-----------------|-------------------|-------------------|
| CON                     | $0.75 \pm 0.10$ | $0.06 \pm 0.01^*$ | $2.01 \pm 0.18^*$ |
| ISO <sub>0.25</sub> MAC | $1.03 \pm 0.13$ | $0.07 \pm 0.01^*$ | $2.06 \pm 0.31^*$ |
| ISO <sub>0.5</sub> MAC  | $0.70 \pm 0.07$ | $0.06 \pm 0.01^*$ | $1.68 \pm 0.15^*$ |
| ISO <sub>1.0</sub> MAC  | $0.63 \pm 0.08$ | $0.06 \pm 0.01^*$ | $1.75 \pm 0.35^*$ |
| ISO <sub>1.25</sub> MAC | $0.81 \pm 0.13$ | $0.05 \pm 0.01^*$ | $1.29 \pm 0.14^*$ |

Data are mean  $\pm$  standard error of the mean.

\* Significantly ( $P < 0.05$ ) different from baseline.

LAD = left anterior descending coronary artery; CAO = coronary artery occlusion; CON = control; ISO = isoflurane.

tions of isoflurane are solely responsible for reductions in infarct size observed in the current or previous investigations. However, the results of experiments conducted in barbiturate-anesthetized dogs may or may not be similar to those observed in conscious dogs or humans.

The area of the LV at risk for development of infarction and degree of coronary collateral blood flow are important determinants of the extent of myocardial infarction. However, no differences in these variables accounting for the current findings were observed among experimental groups. The relation between collateral blood flow and infarct size was also directly evaluated and compared between groups. The contribution of specific signal transduction elements to the protection afforded by different concentrations of isoflurane was not evaluated in the current investigation. Evidence suggests that multiple episodes of IPC may activate both protein kinase C- and tyrosine kinase-mediated pathways, in contrast to a single preconditioning stimulus.<sup>21,28</sup> Whether higher concentrations of or prolonged exposure to isoflurane recruits additional pathways that may also be responsible for myocardial protection will require additional investigation. It is also possible that low concentrations of isoflurane activate only one  $K_{ATP}$  channel subtype, whereas high concentrations activate both sarcolemmal and mitochondrial  $K_{ATP}$  channels. Both channels have been shown to be important during ischemic<sup>26</sup> and anesthetic-induced preconditioning<sup>8</sup> in dogs. This hypothesis will require further evaluation *in vitro*.

In conclusion, the results demonstrate that low concentrations of isoflurane are sufficient to precondition against infarction, but the efficacy of 0.25 or 0.5 MAC isoflurane to decrease infarct size may be diminished in the presence of low coronary collateral blood flow. High concentrations of isoflurane (1.0 or 1.25 MAC) produce profound and equivalent protective effects independent of the extent of coronary collateral perfusion.

The authors thank David Schwabe, B.S., for technical assistance, and Mary Lorence-Hanke, A.A. (Department of Anesthesiology, Medical College of Wisconsin, Milwaukee, WI) for assistance in preparation of the manuscript.

## References

1. Kersten JR, Orth KG, Pagel PS, Mei DA, Gross GJ, Warltier DC: Role of adenosine in isoflurane-induced cardioprotection. *ANESTHESIOLOGY* 1997; 86:1128-39
2. Cope DK, Impastato WK, Cohen MV, Downey JM: Volatile anesthetics protect the ischemic rabbit myocardium from infarction. *ANESTHESIOLOGY* 1997; 86:699-709
3. Roscoe AK, Christensen JD, Lynch C III: Isoflurane, but not halothane, induces protection of human myocardium via adenosine A1 receptors and adenosine triphosphate-sensitive potassium channels. *ANESTHESIOLOGY* 2000; 92:1692-701
4. Toller WG, Montgomery MW, Pagel PS, Hettrick DA, Warltier DC, Kersten JR: Isoflurane-enhanced recovery of canine stunned myocardium: role for protein kinase C? *ANESTHESIOLOGY* 1999; 91:713-22
5. Toller WG, Kersten JR, Gross ER, Pagel PS, Warltier DC: Isoflurane preconditioning myocardium against infarction via activation of inhibitory guanine nucleotide binding proteins. *ANESTHESIOLOGY* 2000; 92:1400-7
6. Kersten JR, Schmeling TJ, Hettrick DA, Pagel PS, Gross GJ, Warltier DC: Mechanism of myocardial protection by isoflurane: Role of adenosine triphosphate-regulated potassium ( $K_{ATP}$ ) channels. *ANESTHESIOLOGY* 1996; 85:794-807
7. Kersten JR, Schmeling TJ, Pagel PS, Gross GJ, Warltier DC: Isoflurane mimics ischemic preconditioning via activation of  $K_{ATP}$  channels: Reduction of myocardial infarct size with an acute memory phase. *ANESTHESIOLOGY* 1997; 87:361-70
8. Toller WG, Gross ER, Kersten JR, Pagel PS, Gross GJ, Warltier DC: Sarcolemmal and mitochondrial adenosine triphosphate-dependent potassium channels: mechanism of desflurane-induced cardioprotection. *ANESTHESIOLOGY* 2000; 92:1731-9
9. Piriou V, Chiari P, Knezynski S, Bastien O, Loufoua J, Lehot JJ, Foex P, Annat G, Ovize M: Prevention of isoflurane-induced preconditioning by 5-hydroxydecanoate and gadolinium: Possible involvement of mitochondrial adenosine triphosphate-sensitive potassium and stretch-activated channels. *ANESTHESIOLOGY* 2000; 93:756-64
10. Cason BA, Gamperl AK, Slocum RE, Hickey RF: Anesthetic-induced preconditioning: previous administration of isoflurane decreases myocardial infarct size in rabbits. *ANESTHESIOLOGY* 1997; 87:1182-90
11. Murry CE, Jennings RB, Reimer KA: Preconditioning with ischemia: a delay of lethal cell injury in ischemic myocardium. *Circulation* 1986; 74:1124-36
12. Guide for the Care and Use of Laboratory Animals. Washington, DC, National Academy Press, 1996
13. Steffey EP, Howland D Jr: Isoflurane potency in the dog and cat. *Am J Vet Res* 1977; 38:1833-6
14. Gross GJ, Auchampach JA: Blockade of ATP-sensitive potassium channels prevents myocardial preconditioning in dogs. *Circ Res* 1992; 70:223-33
15. Warltier DC, Zyvoloski MG, Gross GJ, Hardman HF, Brooks HL: Determination of experimental myocardial infarct size. *J Pharmacol Methods* 1981; 6:199-210
16. Toller WG, Kersten JR, Pagel PS, Hettrick DA, Warltier DC: Sevoflurane reduces myocardial infarct size and decreases the time threshold for ischemic preconditioning in dogs. *ANESTHESIOLOGY* 1999; 91:1437-46
17. Mizumura T, Auchampach JA, Linden J, Bruns RF, Gross GJ: PD 81,723, an allosteric enhancer of the A1 adenosine receptor, lowers the threshold for ischemic preconditioning in dogs. *Circ Res* 1996; 79:415-23
18. Yao Z, Gross GJ: Activation of ATP-sensitive potassium channels lowers threshold for ischemic preconditioning in dogs. *Am J Physiol Heart Circ Physiol* 1994; 267:H1888-94
19. Van Winkle DM, Thornton JD, Downey DM, Downey JM: The natural history of preconditioning: Cardioprotection depends on duration of transient ischemia and time to subsequent ischemia. *Coronary Artery Dis* 1991; 2:613-9
20. Mizumura T, Saito S, Ozawa Y, Kanmatsuse K, Gross GJ: An ATP-sensitive

potassium (KATP) channel opener, nicorandil, lowers the threshold for ischemic preconditioning in barbitol-anesthetized dogs. *Heart Vessels Suppl* 1997; 12: 175-7

21. Fryer RM, Schultz JE, Hsu AK, Gross GJ: Importance of PKC and tyrosine kinase in single or multiple cycles of preconditioning in rat hearts. *Am J Physiol Heart Circ Physiol* 1999; 276:H1229-35

22. Li GC, Vasquez JA, Gallagher KP, Lucchesi BR: Myocardial protection with preconditioning. *Circulation* 1990; 82:609-19

23. Sandhu R, Diaz RJ, Mao GD, Wilson GJ: Ischemic preconditioning: differences in protection and susceptibility to blockade with single-cycle versus multicycle transient ischemia. *Circulation* 1997; 96:984-95

24. Woolfson RG, Patel VC, Yellon DM: Pre-conditioning with adenosine leads to concentration-dependent infarct size reduction in the isolated rabbit heart. *Cardiovasc Res* 1996; 31:148-51

25. Yao Z, Gross GJ: Effects of the KATP channel opener bimakalim on coronary blood flow, monophasic action potential duration, and infarct size in dogs. *Circulation* 1994; 89:1769-75

26. Sanada S, Kitakaze M, Asanuma H, Harada K, Ogita H, Node K, Takashima S, Sakata Y, Asakura M, Shinozaki Y, Mori H, Kuzuya T, Hori M: Role of mitochondrial and sarcolemmal K(ATP) channels in ischemic preconditioning of the canine heart. *Am J Physiol Heart Circ Physiol* 2001; 280:H256-63

27. Schulz R, Post H, Vahlhaus C, Heusch G: Ischemic preconditioning in pigs: A graded phenomenon. Its relation to adenosine and bradykinin. *Circulation* 1998; 98:1022-9

28. Miura T, Miura T, Kawamura S, Goto M, Sakamoto J, Tsuchida A, Matsuzaki M, Shimamoto K: Effect of protein kinase C inhibitors on cardioprotection by ischemic preconditioning depends on the number of preconditioning episodes. *Cardiovasc Res* 1998; 37:700-9
